# Supplementary material for: Validación de una encuesta de recolección de datos antropométricos en niños menores de 2 años asistentes a las guarderías del centro poblado de la ciudad de Azogues durante el año 2008
Source: Royal Society of Chemistry journal article supplement (doi:10.1039/c2dt00055e), 2008-01-01
Supplement: c2dt00055e_7.pdf [file c2dt00055e_7.pdf]

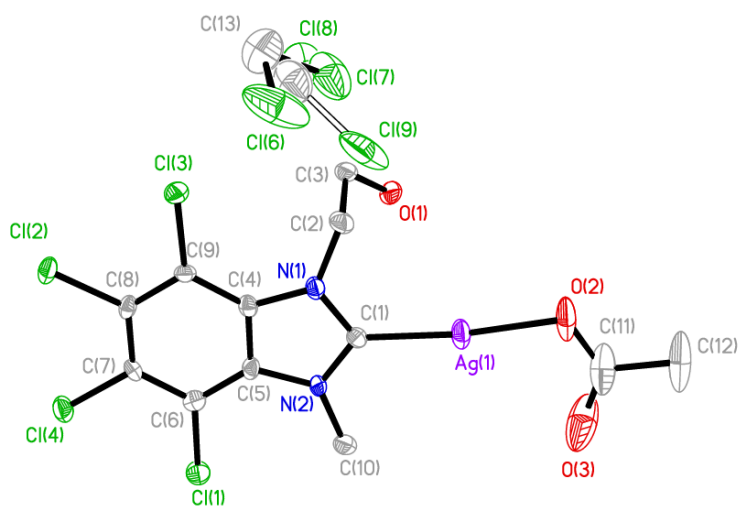

Asymmetric unit of  $C_{12}H_{11}N_2O_3Cl_4Ag_1$  containing one disordered molecule of  $C_1H_2Cl_2$  with thermal ellipsoids drawn at 50% probability.

Table 1. Crystal data and structure refinement for bw.

|                        |                                    |                             |
|------------------------|------------------------------------|-----------------------------|
| Identification code    | bw                                 |                             |
| Empirical formula      | $C_{13}H_{13}AgCl_6N_2O_3$         |                             |
| Formula weight         | 565.82                             |                             |
| Temperature            | 100(2) K                           |                             |
| Wavelength             | 0.71073 Å                          |                             |
| Crystal system         | Monoclinic                         |                             |
| Space group            | P2(1)/c                            |                             |
| Unit cell dimensions   | $a = 8.616(3)$ Å                   | $\alpha = 90^\circ$ .       |
|                        | $b = 13.028(5)$ Å                  | $\beta = 92.684(5)^\circ$ . |
|                        | $c = 17.176(6)$ Å                  | $\gamma = 90^\circ$ .       |
| Volume                 | $1925.9(12)$ Å <sup>3</sup>        |                             |
| Z                      | 4                                  |                             |
| Density (calculated)   | 1.951 Mg/m <sup>3</sup>            |                             |
| Absorption coefficient | 1.895 mm <sup>-1</sup>             |                             |
| F(000)                 | 1112                               |                             |
| Crystal size           | 0.27 x 0.10 x 0.04 mm <sup>3</sup> |                             |

|                                   |                                             |
|-----------------------------------|---------------------------------------------|
| Theta range for data collection   | 1.96 to 26.30°                              |
| Index ranges                      | -10<=h<=10, -16<=k<=16, -21<=l<=21          |
| Reflections collected             | 14692                                       |
| Independent reflections           | 3909 [R(int) = 0.0908]                      |
| Completeness to theta = 26.30°    | 99.9 %                                      |
| Absorption correction             | Semi-empirical from equivalents             |
| Max. and min. transmission        | 0.9213 and 0.6327                           |
| Refinement method                 | Full-matrix least-squares on F <sup>2</sup> |
| Data / restraints / parameters    | 3909 / 0 / 257                              |
| Goodness-of-fit on F <sup>2</sup> | 1.015                                       |
| Final R indices [I>2sigma(I)]     | R1 = 0.0528, wR2 = 0.1296                   |
| R indices (all data)              | R1 = 0.0655, wR2 = 0.1389                   |
| Largest diff. peak and hole       | 1.593 and -0.836 e.Å <sup>-3</sup>          |

Table 2. Atomic coordinates ( $\times 10^4$ ) and equivalent isotropic displacement parameters ( $\text{\AA}^2 \times 10^3$ ) for bw.  $U(\text{eq})$  is defined as one third of the trace of the orthogonalized  $U^{ij}$  tensor.

|       | x       | y       | z        | U(eq) |
|-------|---------|---------|----------|-------|
| Ag(1) | 3214(1) | 4598(1) | 9942(1)  | 28(1) |
| Cl(1) | 7785(1) | 1457(1) | 11630(1) | 27(1) |
| Cl(2) | 7455(1) | -932(1) | 9070(1)  | 24(1) |
| Cl(3) | 5203(1) | 589(1)  | 8209(1)  | 24(1) |
| Cl(4) | 8668(1) | -519(1) | 10766(1) | 26(1) |
| Cl(6) | -996(3) | 227(3)  | 7316(2)  | 78(1) |
| Cl(7) | 1256(6) | 1839(4) | 6990(3)  | 70(1) |
| Cl(8) | 1867(7) | 1617(5) | 6827(4)  | 47(1) |
| Cl(9) | -828(4) | 1538(4) | 7766(2)  | 69(2) |
| O(1)  | 5317(4) | 4291(2) | 8317(2)  | 28(1) |
| O(2)  | 1669(4) | 5838(3) | 9776(3)  | 48(1) |
| O(3)  | 1975(6) | 6198(4) | 11015(4) | 85(2) |
| N(1)  | 4495(4) | 2575(3) | 9351(2)  | 19(1) |
| N(2)  | 5377(4) | 2850(3) | 10541(2) | 18(1) |
| C(1)  | 4468(5) | 3240(3) | 9958(2)  | 19(1) |
| C(2)  | 3718(5) | 2801(3) | 8594(2)  | 24(1) |
| C(3)  | 4798(6) | 3318(3) | 8041(2)  | 25(1) |
| C(4)  | 5467(5) | 1748(3) | 9549(2)  | 17(1) |
| C(5)  | 6033(5) | 1922(3) | 10309(2) | 18(1) |
| C(6)  | 7030(5) | 1238(3) | 10700(2) | 19(1) |
| C(7)  | 7458(5) | 363(3)  | 10301(3) | 17(1) |
| C(8)  | 6893(5) | 176(3)  | 9529(2)  | 17(1) |
| C(9)  | 5896(5) | 864(3)  | 9143(2)  | 18(1) |
| C(10) | 5626(6) | 3360(3) | 11293(3) | 27(1) |
| C(11) | 1369(6) | 6335(4) | 10371(5) | 51(2) |
| C(12) | 189(7)  | 7191(4) | 10281(5) | 68(2) |
| C(13) | 520(17) | 577(10) | 6749(9)  | 51(3) |
| C(14) | 270(20) | 922(14) | 7065(12) | 49(5) |

Table 3. Bond lengths [Å] and angles [°] for bw.

---

|               |            |
|---------------|------------|
| Ag(1)-C(1)    | 2.072(4)   |
| Ag(1)-O(2)    | 2.104(4)   |
| Ag(1)-Ag(1)#1 | 3.2494(13) |
| Cl(1)-C(6)    | 1.720(4)   |
| Cl(2)-C(8)    | 1.725(4)   |
| Cl(3)-C(9)    | 1.723(4)   |
| Cl(4)-C(7)    | 1.723(4)   |
| Cl(6)-C(13)   | 1.728(15)  |
| Cl(7)-C(13)   | 1.803(14)  |
| Cl(8)-C(14)   | 1.71(2)    |
| Cl(9)-C(14)   | 1.76(2)    |
| O(1)-C(3)     | 1.418(5)   |
| O(1)-H(1)     | 0.8200     |
| O(2)-C(11)    | 1.248(8)   |
| O(3)-C(11)    | 1.214(8)   |
| N(1)-C(1)     | 1.357(5)   |
| N(1)-C(4)     | 1.397(5)   |
| N(1)-C(2)     | 1.464(5)   |
| N(2)-C(1)     | 1.342(5)   |
| N(2)-C(5)     | 1.401(5)   |
| N(2)-C(10)    | 1.460(5)   |
| C(2)-C(3)     | 1.518(6)   |
| C(2)-H(2A)    | 0.9700     |
| C(2)-H(2B)    | 0.9700     |
| C(3)-H(3A)    | 0.9700     |
| C(3)-H(3B)    | 0.9700     |
| C(4)-C(5)     | 1.390(6)   |
| C(4)-C(9)     | 1.404(6)   |
| C(5)-C(6)     | 1.389(6)   |
| C(6)-C(7)     | 1.389(6)   |
| C(7)-C(8)     | 1.412(6)   |
| C(8)-C(9)     | 1.388(6)   |
| C(10)-H(10A)  | 0.9600     |
| C(10)-H(10B)  | 0.9600     |

|                    |            |
|--------------------|------------|
| C(10)-H(10C)       | 0.9600     |
| C(11)-C(12)        | 1.512(7)   |
| C(12)-H(12A)       | 0.9600     |
| C(12)-H(12B)       | 0.9600     |
| C(12)-H(12C)       | 0.9600     |
| C(13)-H(13A)       | 0.9700     |
| C(13)-H(13B)       | 0.9700     |
| C(14)-H(14A)       | 0.9700     |
| C(14)-H(14B)       | 0.9700     |
|                    |            |
| C(1)-Ag(1)-O(2)    | 169.53(17) |
| C(1)-Ag(1)-Ag(1)#1 | 77.45(12)  |
| O(2)-Ag(1)-Ag(1)#1 | 110.59(11) |
| C(3)-O(1)-H(1)     | 109.5      |
| C(11)-O(2)-Ag(1)   | 116.2(4)   |
| C(1)-N(1)-C(4)     | 109.7(3)   |
| C(1)-N(1)-C(2)     | 122.0(4)   |
| C(4)-N(1)-C(2)     | 128.0(4)   |
| C(1)-N(2)-C(5)     | 110.1(3)   |
| C(1)-N(2)-C(10)    | 123.0(4)   |
| C(5)-N(2)-C(10)    | 126.9(4)   |
| N(2)-C(1)-N(1)     | 107.5(4)   |
| N(2)-C(1)-Ag(1)    | 128.2(3)   |
| N(1)-C(1)-Ag(1)    | 124.2(3)   |
| N(1)-C(2)-C(3)     | 112.1(4)   |
| N(1)-C(2)-H(2A)    | 109.2      |
| C(3)-C(2)-H(2A)    | 109.2      |
| N(1)-C(2)-H(2B)    | 109.2      |
| C(3)-C(2)-H(2B)    | 109.2      |
| H(2A)-C(2)-H(2B)   | 107.9      |
| O(1)-C(3)-C(2)     | 112.4(4)   |
| O(1)-C(3)-H(3A)    | 109.1      |
| C(2)-C(3)-H(3A)    | 109.1      |
| O(1)-C(3)-H(3B)    | 109.1      |
| C(2)-C(3)-H(3B)    | 109.1      |
| H(3A)-C(3)-H(3B)   | 107.9      |

|                     |          |
|---------------------|----------|
| C(5)-C(4)-N(1)      | 106.4(3) |
| C(5)-C(4)-C(9)      | 120.7(4) |
| N(1)-C(4)-C(9)      | 132.9(4) |
| C(6)-C(5)-C(4)      | 122.1(4) |
| C(6)-C(5)-N(2)      | 131.6(4) |
| C(4)-C(5)-N(2)      | 106.3(4) |
| C(7)-C(6)-C(5)      | 117.4(4) |
| C(7)-C(6)-Cl(1)     | 119.8(3) |
| C(5)-C(6)-Cl(1)     | 122.8(3) |
| C(6)-C(7)-C(8)      | 121.2(4) |
| C(6)-C(7)-Cl(4)     | 119.1(3) |
| C(8)-C(7)-Cl(4)     | 119.7(3) |
| C(9)-C(8)-C(7)      | 121.0(4) |
| C(9)-C(8)-Cl(2)     | 120.2(3) |
| C(7)-C(8)-Cl(2)     | 118.8(3) |
| C(8)-C(9)-C(4)      | 117.7(4) |
| C(8)-C(9)-Cl(3)     | 119.3(3) |
| C(4)-C(9)-Cl(3)     | 123.0(3) |
| N(2)-C(10)-H(10A)   | 109.5    |
| N(2)-C(10)-H(10B)   | 109.5    |
| H(10A)-C(10)-H(10B) | 109.5    |
| N(2)-C(10)-H(10C)   | 109.5    |
| H(10A)-C(10)-H(10C) | 109.5    |
| H(10B)-C(10)-H(10C) | 109.5    |
| O(3)-C(11)-O(2)     | 125.0(5) |
| O(3)-C(11)-C(12)    | 117.4(7) |
| O(2)-C(11)-C(12)    | 117.6(7) |
| C(11)-C(12)-H(12A)  | 109.5    |
| C(11)-C(12)-H(12B)  | 109.5    |
| H(12A)-C(12)-H(12B) | 109.5    |
| C(11)-C(12)-H(12C)  | 109.5    |
| H(12A)-C(12)-H(12C) | 109.5    |
| H(12B)-C(12)-H(12C) | 109.5    |
| Cl(6)-C(13)-Cl(7)   | 112.2(8) |
| Cl(6)-C(13)-H(13A)  | 109.2    |
| Cl(7)-C(13)-H(13A)  | 109.2    |

|                     |           |
|---------------------|-----------|
| Cl(6)-C(13)-H(13B)  | 109.2     |
| Cl(7)-C(13)-H(13B)  | 109.2     |
| H(13A)-C(13)-H(13B) | 107.9     |
| Cl(8)-C(14)-Cl(9)   | 112.7(11) |
| Cl(8)-C(14)-H(14A)  | 109.1     |
| Cl(9)-C(14)-H(14A)  | 109.1     |
| Cl(8)-C(14)-H(14B)  | 109.1     |
| Cl(9)-C(14)-H(14B)  | 109.1     |
| H(14A)-C(14)-H(14B) | 107.8     |

---

Symmetry transformations used to generate equivalent atoms:

#1 -x+1,-y+1,-z+2

Table 4. Anisotropic displacement parameters ( $\text{\AA}^2 \times 10^3$ ) for bw. The anisotropic displacement factor exponent takes the form:  $-2\pi^2 [ h^2 a^2 U^{11} + \dots + 2 h k a^* b^* U^{12} ]$

|       | $U^{11}$ | $U^{22}$ | $U^{33}$ | $U^{23}$ | $U^{13}$ | $U^{12}$ |
|-------|----------|----------|----------|----------|----------|----------|
| Ag(1) | 30(1)    | 16(1)    | 38(1)    | 4(1)     | 6(1)     | 6(1)     |
| Cl(1) | 34(1)    | 25(1)    | 22(1)    | -4(1)    | -8(1)    | 2(1)     |
| Cl(2) | 29(1)    | 16(1)    | 29(1)    | -5(1)    | 4(1)     | 3(1)     |
| Cl(3) | 32(1)    | 20(1)    | 18(1)    | -3(1)    | -1(1)    | -1(1)    |
| Cl(4) | 26(1)    | 21(1)    | 30(1)    | 3(1)     | -2(1)    | 7(1)     |
| Cl(6) | 35(2)    | 141(4)   | 57(2)    | 48(2)    | -3(1)    | -5(2)    |
| Cl(7) | 77(3)    | 48(2)    | 80(3)    | 4(2)     | -41(3)   | -3(2)    |
| Cl(8) | 38(3)    | 53(3)    | 49(2)    | -1(2)    | 2(2)     | -4(2)    |
| Cl(9) | 40(2)    | 120(4)   | 47(2)    | 49(3)    | 12(2)    | 35(2)    |
| O(1)  | 50(2)    | 12(2)    | 23(2)    | 0(1)     | 8(2)     | 0(1)     |
| O(2)  | 39(2)    | 24(2)    | 83(3)    | 12(2)    | 18(2)    | 15(2)    |
| O(3)  | 56(3)    | 82(4)    | 114(4)   | -63(3)   | -36(3)   | 29(3)    |
| N(1)  | 20(2)    | 15(2)    | 21(2)    | 3(1)     | 3(1)     | 2(1)     |
| N(2)  | 27(2)    | 10(2)    | 19(2)    | 2(1)     | 4(2)     | 2(1)     |
| C(1)  | 24(2)    | 15(2)    | 18(2)    | 3(2)     | 4(2)     | 0(2)     |
| C(2)  | 27(2)    | 24(2)    | 19(2)    | 0(2)     | -8(2)    | 2(2)     |
| C(3)  | 45(3)    | 15(2)    | 15(2)    | 0(2)     | -2(2)    | 1(2)     |
| C(4)  | 17(2)    | 13(2)    | 21(2)    | 2(2)     | 2(2)     | -2(2)    |
| C(5)  | 22(2)    | 10(2)    | 22(2)    | 0(2)     | 5(2)     | -1(2)    |
| C(6)  | 19(2)    | 20(2)    | 19(2)    | -1(2)    | 2(2)     | -3(2)    |
| C(7)  | 18(2)    | 14(2)    | 19(2)    | 5(2)     | 0(2)     | 1(2)     |
| C(8)  | 15(2)    | 13(2)    | 24(2)    | -1(2)    | 8(2)     | 0(2)     |
| C(9)  | 22(2)    | 18(2)    | 12(2)    | 0(2)     | 0(2)     | -1(2)    |
| C(10) | 45(3)    | 20(2)    | 18(2)    | 2(2)     | 3(2)     | 2(2)     |
| C(11) | 24(3)    | 21(3)    | 107(6)   | -12(3)   | -3(3)    | -4(2)    |
| C(12) | 30(3)    | 25(3)    | 150(7)   | -3(4)    | 12(4)    | 8(2)     |
| C(13) | 48(7)    | 44(8)    | 62(9)    | -9(6)    | 5(7)     | -11(6)   |
| C(14) | 54(12)   | 35(11)   | 58(13)   | 5(9)     | -9(10)   | -8(8)    |



Table 5. Hydrogen coordinates ( $\times 10^4$ ) and isotropic displacement parameters ( $\text{\AA}^2 \times 10^{-3}$ ) for bw.

|        | x    | y    | z     | U(eq) |
|--------|------|------|-------|-------|
| H(1)   | 4832 | 4454 | 8697  | 42    |
| H(2A)  | 2834 | 3245 | 8671  | 28    |
| H(2B)  | 3332 | 2167 | 8361  | 28    |
| H(3A)  | 5692 | 2879 | 7973  | 30    |
| H(3B)  | 4260 | 3402 | 7537  | 30    |
| H(10A) | 5051 | 3992 | 11292 | 41    |
| H(10B) | 6713 | 3503 | 11384 | 41    |
| H(10C) | 5278 | 2921 | 11699 | 41    |
| H(12A) | 103  | 7535 | 10771 | 102   |
| H(12B) | -802 | 6910 | 10116 | 102   |
| H(12C) | 517  | 7672 | 9898  | 102   |
| H(13A) | 167  | 565  | 6204  | 61    |
| H(13B) | 1354 | 81   | 6820  | 61    |
| H(14A) | 608  | 257  | 7265  | 59    |
| H(14B) | -383 | 806  | 6598  | 59    |
